# Supplementary material for: Partial reprogramming induces a steady decline in epigenetic age before loss of somatic identity
Source: PubMed Central journal article supplement (PMC6351826; doi:10.1111/acel.12877), 2018-11-18
Supplement: ACEL-18-e12877-s003.pdf [file ACEL-18-e12877-s003.pdf]

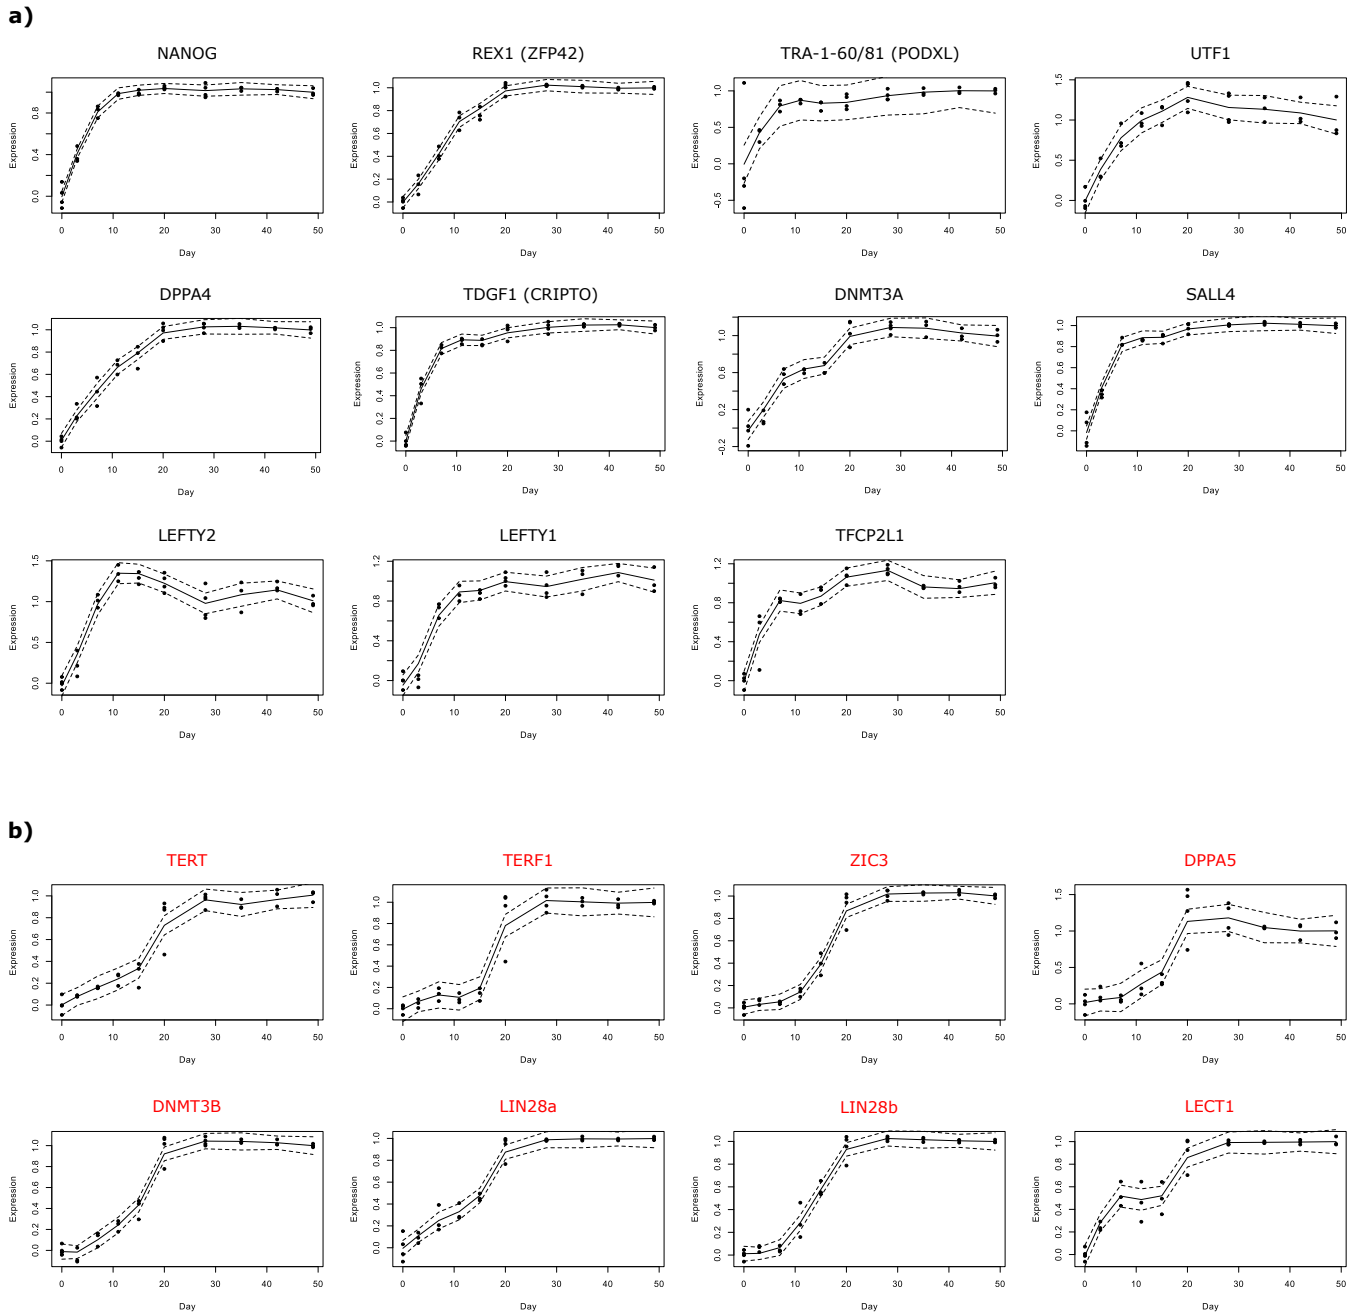

**Figure S3. Expression of key pluripotency markers in a 49-day HDF reprogramming time-course.**

Individual expression dynamics of Cluster 1 genes (early pluripotency markers) in **(a)** and Cluster 2 genes (late expressing pluripotency markers) in **(b)**. Values are LOG2 transformed and normalised between 0 and 1 for 'day 0' and 'day 49', respectively, based on the average values between biological replicates for each time point. Dotted line marks 95% CI. Gene label colours correspond to cluster colours in Fig. 1A.
