# Supplementary material for: Partial reprogramming induces a steady decline in epigenetic age before loss of somatic identity
Source: PubMed Central journal article supplement (PMC6351826; doi:10.1111/acel.12877), 2018-11-18
Supplement: ACEL-18-e12877-s006.pdf [file ACEL-18-e12877-s006.pdf]

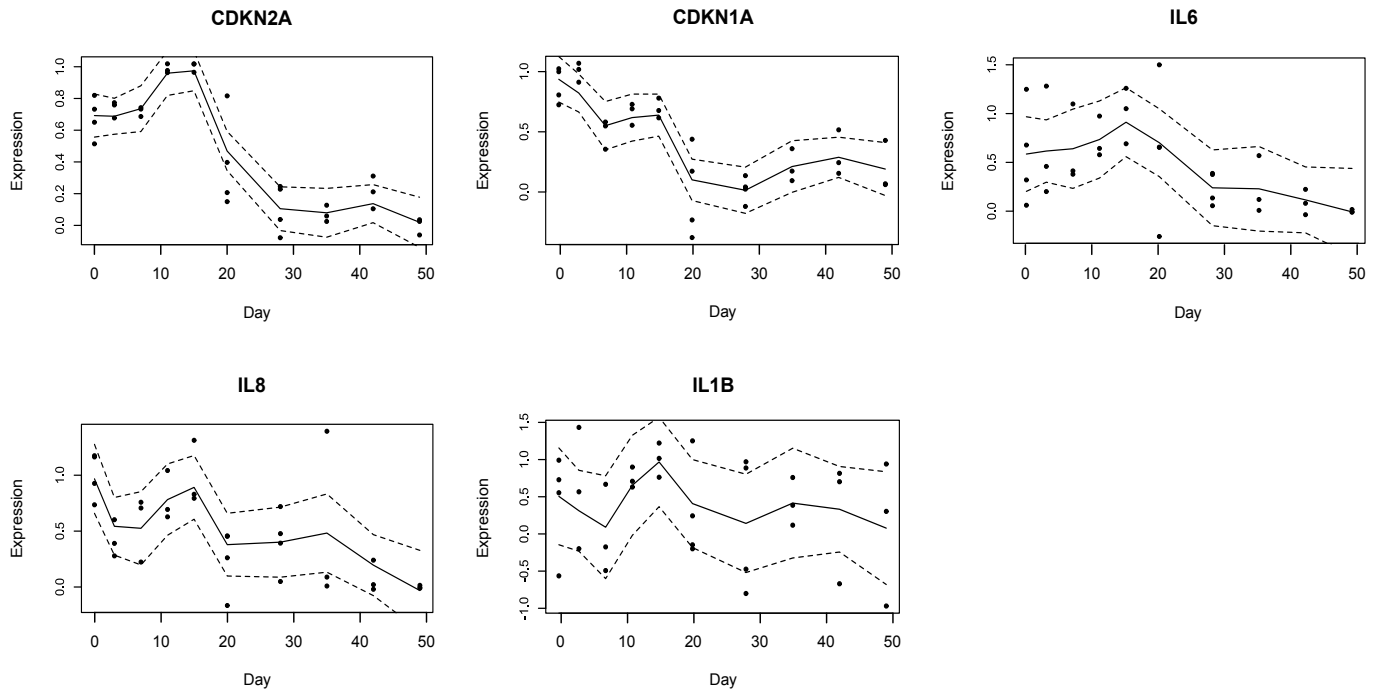

**Figure S6. Expression trajectories of key senescence markers in a 49-day HDF reprogramming time-course.** Individual expression trajectories of 5 senescence associated genes. Values are LOG2 transformed and normalised between 0 and 1 for the 'minimum' and 'maximum' value, respectively, based on the average values between biological replicates for each time point. Dotted line marks 95% CI.
